# Supplementary material for: Therapeutic effects of dental pulp stem cells on vascular dementia in rat models
Source: PubMed Central journal article supplement — Neural Regen Res. 2021 Jan 7;16(8):1645–51. doi: 10.4103/1673-5374.303042 (PMC8323691; doi:10.4103/1673-5374.303042), 2021-01-07
Supplement: NRR-16-1645_Suppl1.pdf [file NRR-16-1645_Suppl1.pdf]

## OPEN PEER REVIEW REPORT 1

**Name of journal:** Neural Regeneration Research

**Manuscript NO:** NRR-D-20-00471

**Title:** Dental pulp stem cells: therapeutic effects in a rat model of vascular dementia

**Reviewer's Name:** Willian Orlando Castillo

**Reviewer's country:** Brazil

### COMMENTS TO AUTHORS

The findings reinforce the possitive effects of the DPSC transplantation in 2-VO rat model of VaD, however, in the introduction, the authors should describe the principal topic, since it is not clear if the topic is Alzheimer's or Vascular Disease. It is also necessary to review the most up-to-date bibliography about these topics.

In the secction of discussion(Line 41-43), the authors should considerate that these drugs have small positive effect in VaD, which are likely due to their action on co-existing AD-related neuropathology, The action mechanisms of these drugs are associated with acetylcholinesterase inhibition.
